# Supplementary material for: Snakebites in Rural Areas of Brazil by Race: Indigenous the Most Exposed Group
Source: MDPI journal article supplement (doi:10.3390/ijerph18179365), 2021-09-05
Supplement: s1 [file s1]

### Supplementary Materials

**Table S1.** Country and region profiles, total population, percentage of population living in rural areas, literacy rate (as % of population 15 years and older), GDP per capita (Reais), number of hospitals with antivenom, Brazil

| Region        | Total population <sup>a</sup> | Pop living in rural areas (%) <sup>a</sup> | Literacy rate (%) <sup>b</sup> | GDP per capita (Reais, 2009) <sup>c</sup> | No of hospitals with antivenom <sup>d</sup> |
|---------------|-------------------------------|--------------------------------------------|--------------------------------|-------------------------------------------|---------------------------------------------|
| North         | 15,864,454                    | 26.5                                       | 90.9                           | 17,213                                    | 292                                         |
| Northeast     | 53,081,950                    | 26.8                                       | 83.8                           | 12,955                                    | 275                                         |
| Southeast     | 80,364,410                    | 7.1                                        | 95.7                           | 34,790                                    | 343                                         |
| South         | 27,386,891                    | 15.1                                       | 95.9                           | 30,495                                    | 578                                         |
| Central- West | 14,058,094                    | 11.2                                       | 94.3                           | 32,826                                    | 118                                         |
| Brazil        | 190,755,799                   | 15.6                                       | 92.0                           | 26,446                                    | 1606                                        |

Sources and legend:

<sup>a</sup> IBGE (2010)

<sup>b</sup> IBGE (2019)

<sup>c</sup> IBGE (2016)

<sup>d</sup> Ministry of Health of Brazil (circa 2019)

**Table S2.** Case classification by genus of the snake according to the Ministry of Health guideline and the number of ampoules recommended (non-official translation)

| Accident                    | Antivenom                                                   | Severity                                                                                                                   | Number of ampoules |
|-----------------------------|-------------------------------------------------------------|----------------------------------------------------------------------------------------------------------------------------|--------------------|
| <b>Bothropic</b>            | <b>SAB<sup>b</sup> SABL<sup>c</sup> or SABC<sup>d</sup></b> | Mild: Non-evident symptoms, i.e., light bleeding in the skin and/or mucous membranes; there may only be a clotting issue   | <b>2 - 4</b>       |
|                             |                                                             | Moderate: Evident edema and ecchymosis, bleeding without compromising the general condition; there may be a clotting issue | <b>4 - 8</b>       |
|                             |                                                             | Serious: Severe local changes, severe hemorrhage, hypotension/shock, renal failure, anuria; there may be a clotting issue  | <b>12</b>          |
| <b>Lachetic<sup>a</sup></b> | <b>SABL</b>                                                 | Moderate: Evident symptoms; there may be bleeding, no vagal manifestations                                                 | <b>10</b>          |
|                             |                                                             | Serious: Intense localized symptoms upon presentation, intense hemorrhage, with vagal manifestations                       | <b>20</b>          |
| <b>Crotalic</b>             | <b>SAC<sup>e</sup> or SABC</b>                              | Mild: Mild neuromuscular changes; no myalgia, darkening of urine, or oliguria                                              | <b>5</b>           |

|               |                         |                                                                                                  |    |
|---------------|-------------------------|--------------------------------------------------------------------------------------------------|----|
|               |                         | Moderate: Evident<br>neuromuscular changes, mild<br>myalgia and myoglobinuria<br>(dark urine)    | 10 |
|               |                         | Serious: Evident<br>neuromuscular alterations,<br>intense myalgia and<br>myoglobinuria, oliguria | 20 |
| <b>Elapid</b> | <b>SAEl<sup>a</sup></b> | Consider all cases as potentially<br>serious due to the risk of<br>insufficient respiration      | 10 |

Source: Adapted from the manual for the diagnosis and treatment of accidents by venomous animals (2001) and the epidemiological surveillance guide (2009).

**Lachetic<sup>a</sup>** = due to the potential seriousness of a lachetic envenomation accident, they are always considered clinically moderate or severe, with no mild cases

**SAB<sup>b</sup>** = Antiothopic serum (pentavalent)

**SABL<sup>c</sup>** = Antiothopic (pentavalent) and antilachetic serum

**SABC<sup>d</sup>** = Antiothopic (pentavalent) and anticrotalytic serum

**SAC<sup>e</sup>** = Anticrotalytic serum

**SAEl<sup>a</sup>** = Anti-elapitic serum (bivalent)

**Table S3.** Cases of snakebite with reported information on the genus of the snake, in rural population, by state, Brazil, 2017

| State               | <i>Bothrops</i> | <i>Crotalus</i> | <i>Micrurus</i> | <i>Lachesis</i> | Non-venomous | Ignored      | Total         |
|---------------------|-----------------|-----------------|-----------------|-----------------|--------------|--------------|---------------|
| Rondônia            | 244             | 1               | 4               | 5               | 27           | 21           | 302           |
| Acre                | 188             | 2               | 2               | 33              | 4            | 39           | 268           |
| Amazonas            | 883             | 1               | 4               | 154             | 35           | 34           | 1,111         |
| Roraima             | 251             | 42              | 2               | 11              | 3            | 13           | 322           |
| Pará                | 3,278           | 28              | 3               | 96              | 27           | 95           | 3,527         |
| Amapá               | 214             | 3               | 1               | 17              | 0            | 13           | 248           |
| Tocantins           | 213             | 55              | 2               | 2               | 8            | 33           | 313           |
| Maranhão            | 516             | 216             | 7               | 6               | 31           | 68           | 844           |
| Piauí               | 67              | 39              | 7               | 0               | 19           | 45           | 177           |
| Ceará               | 357             | 48              | 14              | 3               | 59           | 89           | 570           |
| Rio Grande do Norte | 152             | 16              | 8               | 0               | 10           | 33           | 219           |
| Paraíba             | 153             | 17              | 9               | 0               | 43           | 37           | 259           |
| Pernambuco          | 172             | 53              | 14              | 4               | 72           | 140          | 455           |
| Alagoas             | 57              | 26              | 3               | 2               | 31           | 31           | 150           |
| Sergipe             | 40              | 5               | 0               | 0               | 7            | 26           | 78            |
| Bahia               | 1,232           | 86              | 11              | 6               | 71           | 288          | 1,694         |
| Minas Gerais        | 1,186           | 333             | 5               | 3               | 79           | 169          | 1,775         |
| Espírito Santo      | 474             | 6               | 0               | 0               | 27           | 51           | 558           |
| Rio de Janeiro      | 208             | 9               | 1               | 2               | 3            | 14           | 237           |
| São Paulo           | 518             | 99              | 5               | 1               | 55           | 108          | 786           |
| Paraná              | 337             | 66              | 2               | 0               | 80           | 44           | 529           |
| Santa Catarina      | 219             | 4               | 3               | 0               | 18           | 24           | 268           |
| Rio Grande do Sul   | 474             | 8               | 2               | 0               | 33           | 58           | 575           |
| Mato Grosso do Sul  | 234             | 28              | 3               | 0               | 18           | 28           | 311           |
| Mato Grosso         | 580             | 22              | 2               | 8               | 19           | 42           | 673           |
| Goiás               | 390             | 80              | 3               | 0               | 15           | 34           | 522           |
| Distrito Federal    | 24              | 4               | 1               | 0               | 1            | 4            | 34            |
| <b>Brazil</b>       | <b>12,661</b>   | <b>1,297</b>    | <b>118</b>      | <b>353</b>      | <b>795</b>   | <b>1,581</b> | <b>16,805</b> |

**Figure S1.** Flowchart of the study design with the number of observations of snakebites in each category, Brazil, 2017

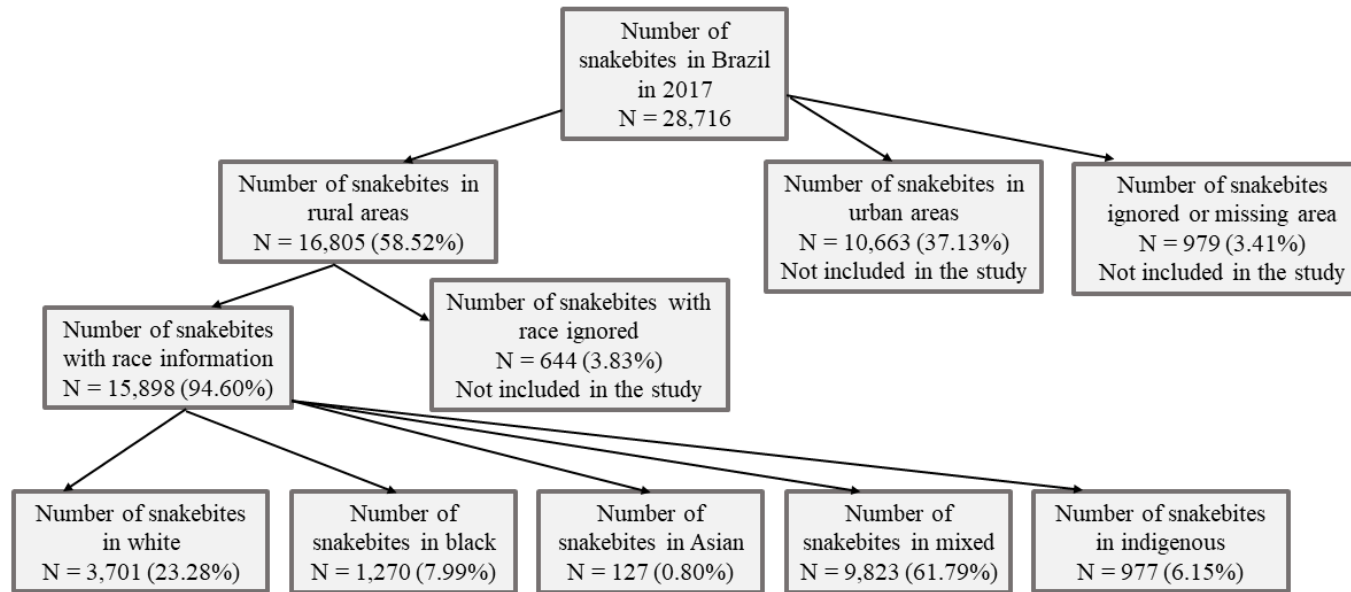

**Table S4.** Snakebite cases in total and rural population by race, by state and by region, Brazil, 2017.

| State               | Cases total population |       |       |       |            |         |       | Cases rural population |       |       |       |            |       |
|---------------------|------------------------|-------|-------|-------|------------|---------|-------|------------------------|-------|-------|-------|------------|-------|
|                     | White                  | Black | Asian | Mixed | Indigenous | Unknown | Total | White                  | Black | Asian | Mixed | Indigenous | Total |
| Rondônia            | 96                     | 24    | 3     | 311   | 15         | 29      | 478   | 68                     | 16    |       | 190   | 13         | 287   |
| Acre                | 35                     | 15    | 1     | 370   | 22         | 4       | 447   | 18                     | 9     | 1     | 218   | 18         | 264   |
| Amazonas            | 42                     | 36    | 8     | 1151  | 329        | 25      | 1591  | 23                     | 27    | 6     | 757   | 285        | 1098  |
| Roraima             | 11                     | 10    |       | 132   | 277        | 32      | 462   | 6                      | 8     |       | 45    | 244        | 303   |
| Pará                | 287                    | 405   | 36    | 3883  | 60         | 178     | 4849  | 199                    | 278   | 28    | 2867  | 48         | 3420  |
| Amapá               | 42                     | 48    | 2     | 255   | 18         | 36      | 401   | 20                     | 28    | 1     | 152   | 16         | 217   |
| Tocantins           | 54                     | 37    | 8     | 514   | 25         | 18      | 656   | 21                     | 15    | 8     | 237   | 22         | 303   |
| Maranhão            | 91                     | 123   | 15    | 1042  | 69         | 38      | 1378  | 38                     | 75    | 10    | 638   | 64         | 825   |
| Piauí               | 20                     | 13    |       | 223   | 1          | 17      | 274   | 14                     | 8     |       | 145   | 1          | 168   |
| Ceará               | 85                     | 51    | 6     | 644   | 4          | 28      | 818   | 71                     | 40    | 3     | 435   | 1          | 550   |
| Rio Grande do Norte | 57                     | 10    | 1     | 302   |            | 55      | 425   | 33                     | 3     |       | 147   |            | 183   |
| Paraíba             | 62                     | 27    | 3     | 253   | 1          | 70      | 416   | 34                     | 18    | 1     | 172   | 1          | 226   |
| Pernambuco          | 69                     | 28    | 13    | 514   | 7          | 203     | 834   | 41                     | 19    | 9     | 318   | 7          | 394   |
| Alagoas             | 15                     | 15    | 2     | 252   | 1          | 45      | 330   | 5                      | 8     |       | 113   | 1          | 127   |
| Sergipe             | 5                      | 10    | 1     | 97    |            | 46      | 159   | 3                      | 6     |       | 48    |            | 57    |
| Bahia               | 191                    | 401   | 16    | 1660  | 28         | 330     | 2626  | 137                    | 283   | 10    | 1081  | 23         | 1534  |
| Minas Gerais        | 1151                   | 331   | 42    | 1630  | 12         | 184     | 3350  | 579                    | 178   | 22    | 923   | 8          | 1710  |
| Espírito Santo      | 375                    | 62    | 6     | 250   | 1          | 44      | 738   | 302                    | 43    | 5     | 175   | 1          | 526   |
| Rio de Janeiro      | 232                    | 78    | 1     | 142   | 1          | 156     | 610   | 109                    | 31    | 1     | 66    | 1          | 208   |
| São Paulo           | 1301                   | 127   | 16    | 571   | 16         | 174     | 2205  | 466                    | 55    | 4     | 202   | 8          | 735   |
| Paraná              | 704                    | 23    | 6     | 152   | 11         | 36      | 932   | 413                    | 18    | 2     | 67    | 9          | 509   |
| Santa Catarina      | 620                    | 9     | 5     | 39    | 9          | 13      | 695   | 242                    |       | 3     | 13    | 9          | 267   |
| Rio Grande do Sul   | 772                    | 23    | 2     | 62    | 18         | 35      | 912   | 494                    | 11    | 1     | 34    | 18         | 558   |
| Mato Grosso do Sul  | 186                    | 22    | 8     | 243   | 96         | 29      | 584   | 89                     | 9     | 1     | 116   | 83         | 298   |
| Mato Grosso         | 335                    | 77    | 9     | 582   | 104        | 69      | 1176  | 165                    | 45    | 5     | 320   | 96         | 631   |
| Goiás               | 267                    | 72    | 11    | 812   | 4          | 102     | 1268  | 105                    | 38    | 6     | 336   |            | 485   |
| Distrito Federal    | 9                      | 2     |       | 23    | 1          | 67      | 102   | 6                      | 1     |       | 8     |            | 15    |

|               |      |      |     |       |      |      |       |      |      |     |      |     |       |
|---------------|------|------|-----|-------|------|------|-------|------|------|-----|------|-----|-------|
| <b>Brazil</b> | 7114 | 2079 | 221 | 16109 | 1130 | 2063 | 28716 | 3701 | 1270 | 127 | 9823 | 977 | 15898 |
|---------------|------|------|-----|-------|------|------|-------|------|------|-----|------|-----|-------|

**Table S5.** Rural population by race, snakebite cases by race, by state and by region, Brazil, 2017

| Rural Population    |               |               |              |                |               |            |                | Cases      |            |           |             |            |             |
|---------------------|---------------|---------------|--------------|----------------|---------------|------------|----------------|------------|------------|-----------|-------------|------------|-------------|
| States              | White         | Black         | Asian        | Mixed          | Indigenous    | Unknown    | Total          | White      | Black      | Asian     | Mixed       | Indigenous | Total       |
| Rondônia            | 142646        | 26937         | 4085         | 230350         | 9109          | 102        | 413229         | 68         | 16         | 0         | 190         | 13         | 287         |
| Acre                | 37555         | 12938         | 3119         | 134338         | 13326         | 4          | 201280         | 18         | 9          | 1         | 218         | 18         | 264         |
| Amazonas            | 79921         | 30694         | 4155         | 479347         | 134378        | 0          | 728495         | 23         | 27         | 6         | 757         | 285        | 1098        |
| Roraima             | 10683         | 4281          | 637          | 48594          | 41425         | 0          | 105620         | 6          | 8          | 0         | 45          | 244        | 303         |
| Pará                | 400876        | 171422        | 18838        | 1769007        | 29115         | 234        | 2389492        | 199        | 278        | 28        | 2867        | 48         | 3420        |
| Amapá               | 9816          | 6634          | 789          | 45201          | 6048          | 2          | 68490          | 20         | 28         | 1         | 152         | 16         | 217         |
| Tocantins           | 54382         | 27501         | 4328         | 196176         | 10952         | 0          | 293339         | 21         | 15         | 8         | 237         | 22         | 303         |
| <i>North</i>        | <i>735879</i> | <i>280407</i> | <i>35951</i> | <i>2903013</i> | <i>244353</i> | <i>342</i> | <i>4199945</i> | <i>355</i> | <i>381</i> | <i>44</i> | <i>4466</i> | <i>646</i> | <i>5892</i> |
| Maranhão            | 442286        | 225868        | 25915        | 1705199        | 28361         | 11         | 2427640        | 38         | 75         | 10        | 638         | 64         | 825         |
| Piauí               | 221084        | 99409         | 23941        | 722380         | 587           | 0          | 1067401        | 14         | 8          | 0         | 145         | 1          | 168         |
| Ceará               | 559042        | 92386         | 22337        | 1425317        | 6726          | 4          | 2105812        | 71         | 40         | 3         | 435         | 1          | 550         |
| Rio Grande do Norte | 233318        | 33646         | 6313         | 428958         | 517           | 284        | 703036         | 33         | 3          | 0         | 147         | 0          | 183         |
| Paraíba             | 328499        | 44663         | 11436        | 533521         | 9724          | 7          | 927850         | 34         | 18         | 1         | 172         | 1          | 226         |
| Pernambuco          | 536969        | 91404         | 15550        | 1072810        | 27504         | 1          | 1744238        | 41         | 19         | 9         | 318         | 7          | 394         |
| Alagoas             | 224324        | 47886         | 9807         | 532338         | 8276          | 3          | 822634         | 5          | 8          | 0         | 113         | 1          | 127         |
| Sergipe             | 129817        | 41607         | 5627         | 369813         | 773           | 14         | 547651         | 3          | 6          | 0         | 48          | 0          | 57          |
| Bahia               | 829673        | 515301        | 39592        | 2509708        | 20061         | 95         | 3914430        | 137        | 283        | 10        | 1081        | 23         | 1534        |

|                     |                |                |               |                |               |            |                 |             |            |           |             |            |             |
|---------------------|----------------|----------------|---------------|----------------|---------------|------------|-----------------|-------------|------------|-----------|-------------|------------|-------------|
| <i>Northeast</i>    | <i>3505012</i> | <i>1192170</i> | <i>160518</i> | <i>9300044</i> | <i>102529</i> | <i>419</i> | <i>14260692</i> | <i>376</i>  | <i>460</i> | <i>33</i> | <i>3097</i> | <i>98</i>  | <i>4064</i> |
| Minas Gerais        | 1166095        | 225194         | 20263         | 1459290        | 11269         | 3          | 2882114         | 579         | 178        | 22        | 923         | 8          | 1710        |
| Espírito Santo      | 282933         | 41372          | 2390          | 253974         | 2811          | 0          | 583480          | 302         | 43         | 5         | 175         | 1          | 526         |
| Rio de Janeiro      | 244843         | 70256          | 3995          | 205847         | 738           | 11         | 525690          | 109         | 31         | 1         | 66          | 1          | 208         |
| São Paulo           | 1073471        | 69939          | 19085         | 510122         | 3879          | 452        | 1676948         | 466         | 55         | 4         | 202         | 8          | 735         |
| <i>Southeast</i>    | <i>2767342</i> | <i>406761</i>  | <i>45733</i>  | <i>2429233</i> | <i>18697</i>  | <i>466</i> | <i>5668232</i>  | <i>1456</i> | <i>307</i> | <i>32</i> | <i>1366</i> | <i>18</i>  | <i>3179</i> |
| Paraná              | 1061244        | 39284          | 11799         | 406096         | 13406         | 5          | 1531834         | 413         | 18         | 2         | 67          | 9          | 509         |
| Santa Catarina      | 844120         | 23772          | 3768          | 120499         | 8361          | 3          | 1000523         | 242         | 0          | 3         | 13          | 9          | 267         |
| Rio Grande do Sul   | 1363109        | 51535          | 7389          | 152428         | 19169         | 8          | 1593638         | 494         | 11         | 1         | 34          | 18         | 558         |
| <i>South</i>        | <i>3268473</i> | <i>114591</i>  | <i>22956</i>  | <i>679023</i>  | <i>40936</i>  | <i>16</i>  | <i>4125995</i>  | <i>1149</i> | <i>29</i>  | <i>6</i>  | <i>114</i>  | <i>36</i>  | <i>1334</i> |
| Mato Grosso do Sul  | 126864         | 14027          | 2179          | 149877         | 58838         | 1          | 351786          | 89          | 9          | 1         | 116         | 83         | 298         |
| Mato Grosso         | 183165         | 33452          | 4221          | 294746         | 36717         | 20         | 552321          | 165         | 45         | 5         | 320         | 96         | 631         |
| Goiás               | 223141         | 39123          | 7654          | 312641         | 514           | 1          | 583074          | 105         | 38         | 6         | 336         | 0          | 485         |
| Distrito Federal    | 29241          | 6961           | 1699          | 49832          | 187           | 30         | 87950           | 6           | 1          | 0         | 8           | 0          | 15          |
| <i>Central-West</i> | <i>562411</i>  | <i>93563</i>   | <i>15753</i>  | <i>807096</i>  | <i>96256</i>  | <i>52</i>  | <i>1575131</i>  | <i>365</i>  | <i>93</i>  | <i>12</i> | <i>780</i>  | <i>179</i> | <i>1429</i> |
| <b>Brazil</b>       | 10839117       | 2087492        | 280911        | 16118409       | 502771        | 1295       | 29829995        | 3701        | 1270       | 127       | 9823        | 977        | 15898       |
